# Supplementary material for: CHRNA3 Polymorphism Modifies Lung Adenocarcinoma Risk in the Chinese Han Population
Source: Int J Mol Sci. 2014 Mar 28;15(4):5446–57. doi: 10.3390/ijms15045446 (PMC4013574; doi:10.3390/ijms15045446)
Supplement: Supplementary file 1 [file ijms-15-05446-s001.pdf]

## Supplementary Information

**Table S1.** Association of the risk of lung adenocarcinoma with two SNPs stratified by gender, smoking status and TNM staging.

| Fitting Model                       | rs8042374                |              | rs938682                 |              |
|-------------------------------------|--------------------------|--------------|--------------------------|--------------|
|                                     | Overdominant             |              | Dominant                 |              |
|                                     | OR (95% CI) <sup>a</sup> | <i>p</i>     | OR (95% CI) <sup>a</sup> | <i>p</i>     |
| Female ( <i>n</i> = 154)            | 1.79 (1.04–3.07)         | <b>0.033</b> | 0.70 (0.40–1.21)         | 0.200        |
| Male ( <i>n</i> = 147)              | 1.61 (0.90–2.89)         | 0.110        | 0.66 (0.36–1.20)         | 0.170        |
| Nonsmokers ( <i>n</i> = 219)        | 1.80 (1.18–2.75)         | <b>0.006</b> | 0.73 (0.47–1.13)         | 0.160        |
| Smokers ( <i>n</i> = 82)            | 1.28 (0.67–2.45)         | 0.460        | 0.50 (0.26–0.97)         | <b>0.042</b> |
| I + II ( <i>n</i> = 183)            | 1.81 (1.14–2.87)         | <b>0.011</b> | 0.82 (0.51–1.33)         | 0.420        |
| III + IV ( <i>n</i> = 118)          | 1.58 (0.96–2.60)         | 0.072        | 0.54 (0.33–0.89)         | <b>0.016</b> |
| Female nonsmokers ( <i>n</i> = 144) | 1.81 (1.05–3.12)         | <b>0.032</b> | 0.77 (0.44–1.35)         | 0.360        |
| Male nonsmokers ( <i>n</i> = 75)    | 1.79 (0.91–3.52)         | 0.091        | 0.66 (0.33–1.30)         | 0.230        |
| Female smokers ( <i>n</i> = 10)     | 0.69 (0.13–3.76)         | 0.670        | 0.28 (0.07–1.12)         | 0.068        |
| Male smokers ( <i>n</i> = 72)       | 1.43 (0.70–2.95)         | 0.330        | 0.58 (0.27–1.26)         | 0.170        |
| Female I + II ( <i>n</i> = 96)      | 1.92 (1.03–3.57)         | <b>0.039</b> | 0.75 (0.40–1.40)         | 0.360        |
| Male I + II ( <i>n</i> = 87)        | 1.68 (0.85–3.34)         | 0.130        | 0.94 (0.45–1.97)         | 0.870        |
| Female III + IV ( <i>n</i> = 58)    | 1.56 (0.78–3.12)         | 0.210        | 0.72 (0.36–1.45)         | 0.360        |
| Male III + IV ( <i>n</i> = 60)      | 1.61 (0.78–3.29)         | 0.200        | 0.40 (0.20–0.82)         | <b>0.012</b> |

<sup>a</sup> Adjusted by age and gender. Bold mean *p* < 0.05.

© 2014 by the authors; licensee MDPI, Basel, Switzerland. This article is an open access article distributed under the terms and conditions of the Creative Commons Attribution license (<http://creativecommons.org/licenses/by/3.0/>).
